# Supplementary material for: Carbon quantum dot-anchored polyaniline on electrospun carbon nanofibers as freestanding electrodes for symmetric solid-state supercapacitors
Source: Royal Society of Chemistry journal article supplement (doi:10.1039/d4dt03410d), 2025-01-01
Supplement: d4dt03410d1.pdf [file d4dt03410d1.pdf]

# **Carbon Quantum Dots–Anchored Polyaniline on Electrospun Carbon Nanofibers as Freestanding Electrodes for Symmetric Solid-state Supercapacitor**

Yunwei Zou, Yan Bu, Xuejiao Zhou\*, Mingqi Hu and Mingyi Zhang\*

*Key Laboratory for Photonic and Electronic Bandgap Materials, Ministry of Education,  
School of Physics and Electronic Engineering, Harbin Normal University, Harbin 150025,  
People's Republic of China*

## **Corresponding Authors**

\*E-mail: [zhangmingyi@hrbnu.edu.cn](mailto:zhangmingyi@hrbnu.edu.cn) (M. Y. Zhang)

\*E-mail: [zhouxj@hrbnu.edu.cn](mailto:zhouxj@hrbnu.edu.cn) (X. J. Zhou)

Tel: +86 45188060349

### ***Characterization***

The instruments and ancillary information used for the basic characterization of the microstructure of electrode materials are as follows: Scanning Electron Microscopy (SEM, Hitachi SU70), Transmission Electron Microscopy (TEM, Philips TECNAI-20), X-ray Diffraction (XRD, Rigaku D/max2600), Fourier Transform Infrared Spectroscopy (FTIR, Alpha-Centauri), and X-ray Photoelectron Spectroscopy (XPS, Shimadzu AXIS SUPRA+). A 5 mV disturbance voltage was used to conduct electrochemical impedance spectroscopy (EIS) employing VMP3 electrochemical analyzer.

**Figure Captions:**

**Fig. S1** The diameter histogram of (a) CNFs, (b) CNFs/PANI, and (c) CNFs/PANI/CQDs NFs.

**Fig. S2** (a) CV and (b) GCD curves of PANI, and (c) CV and (d) GCD curves of PANI/CQDs hybrid electrode at various scan rates and current densities.

**Fig. S3** The inverse of the stored charge versus the square root of the scan rate.

**Fig. S4** Equivalent circuit of CNFs/PANI/CQDs electrode.

**Fig. S5** SEM image of CNFs/PANI/CQDs free-standing electrode after electrochemical tests.

**Fig. S6** (a-d) CV curves of CNFs/PANI/CQDs electrode and the corresponding capacitive contributions at scan rates of 10, 20, 30 and 50 mV s<sup>-1</sup>.

**Fig. S7** (a) CV curves, (b) GCD data, and (c) image of the symmetric SSC after mechanical bending, (g) along with its application in red LED lighting.

**Fig. S8** The Nyquist curves of the symmetric SSC.

**Table S1** Capacitance values of the CNFs/PANI/CQDs electrode and cycling ability of symmetric SSC contrast of relevant reports.

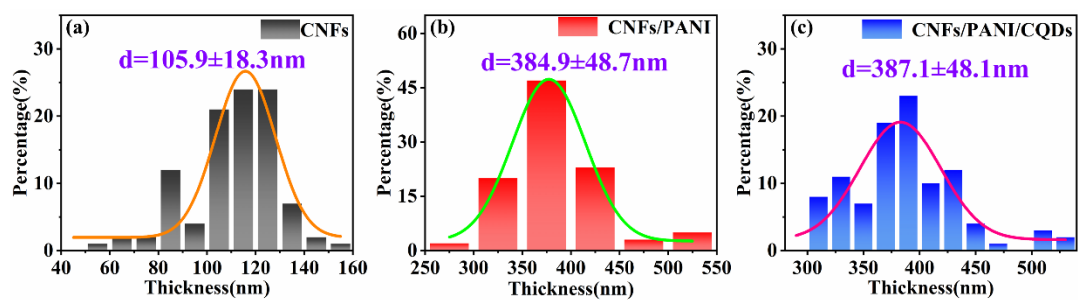

**Fig. S1** The diameter histogram of (a) CNFs, (b) CNFs/PANI, and (c) CNFs/PANI/CQDs NFs.

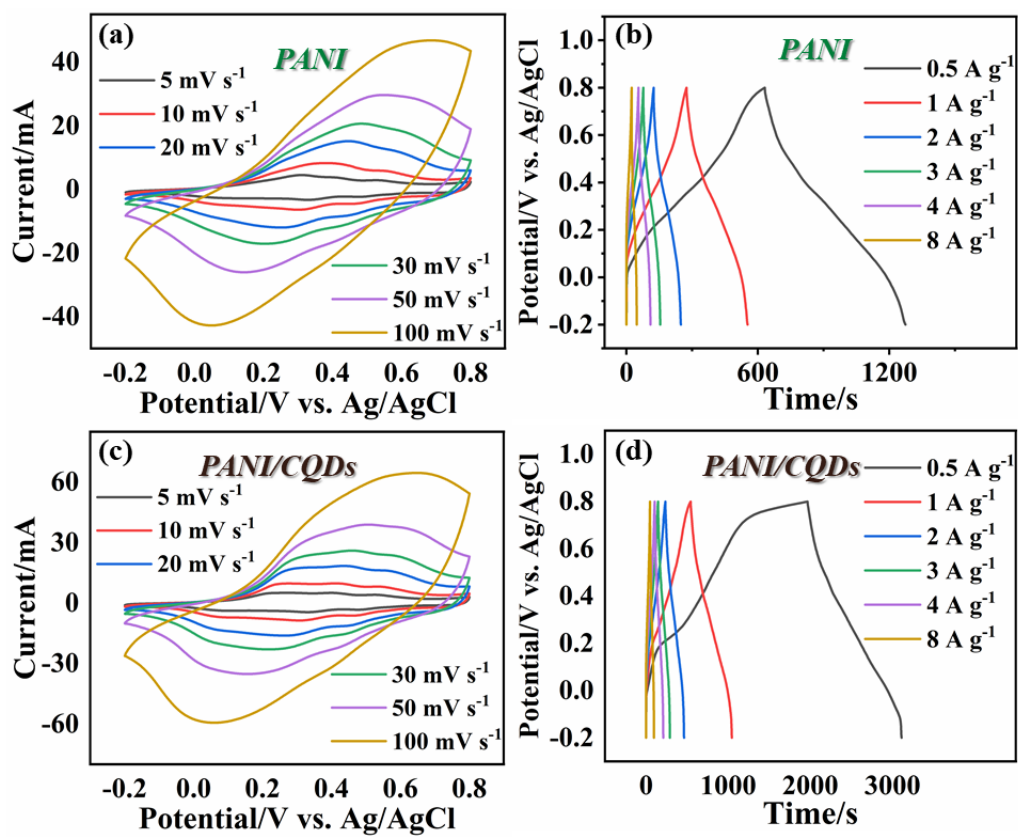

**Fig. S2** (a) CV and (b) GCD curves of PANI, and (c) CV and (d) GCD curves of PANI/CQDs hybrid electrode at various scan rates and current densities.

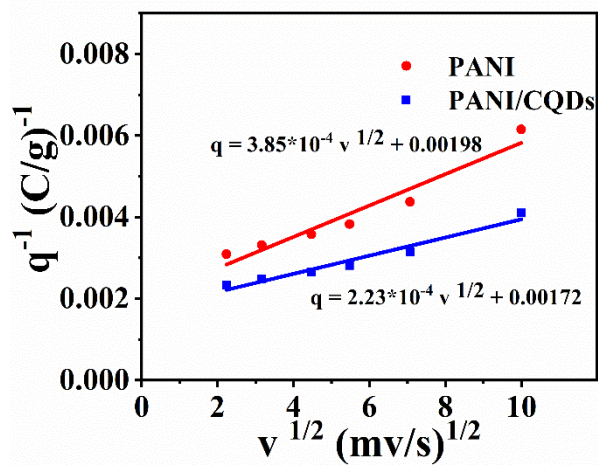

**Fig. S3** The inverse of the stored charge versus the square root of the scan rate.

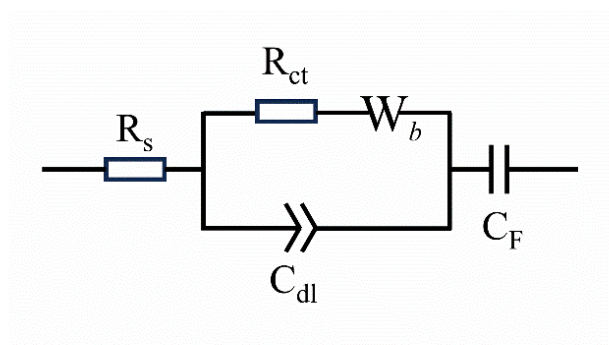

**Fig. S4** Equivalent circuit of CNFs/PANI/CQDs electrode.

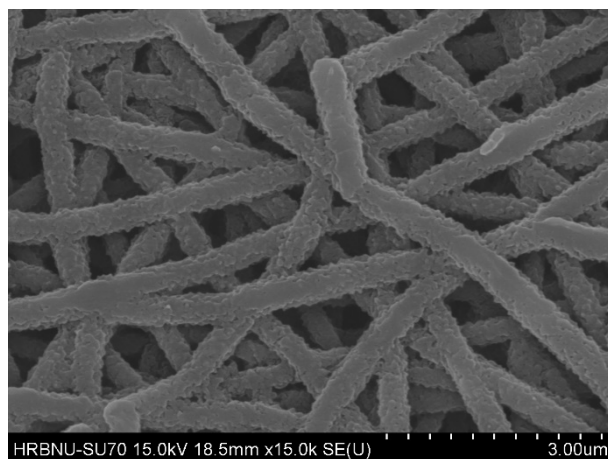

**Fig. S5** SEM image of CNFs/PANI/CQDs free-standing electrode after electrochemical tests.



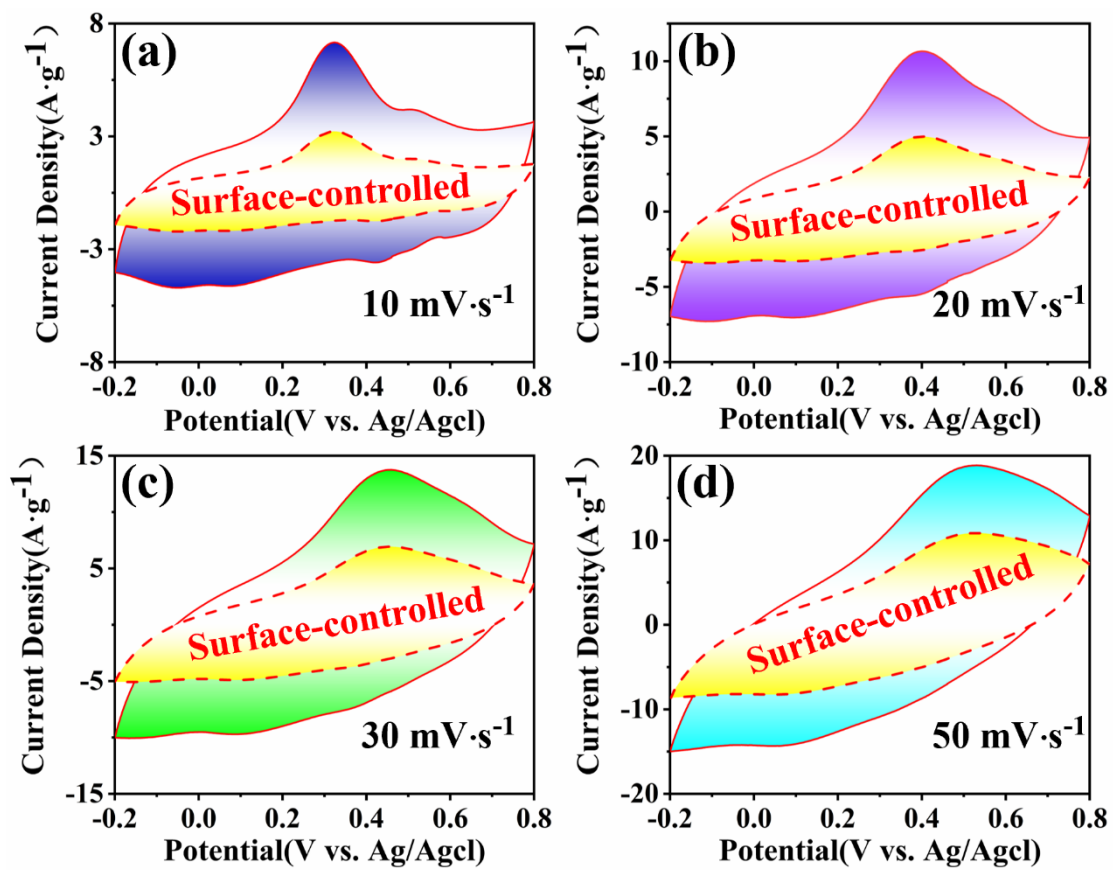

**Fig. S6** (a-d) CV curves of CNFs/PANI/CQDs electrode and the corresponding capacitive contributions at scan rates of 10, 20, 30 and 50  $\text{mV}\cdot\text{s}^{-1}$ .

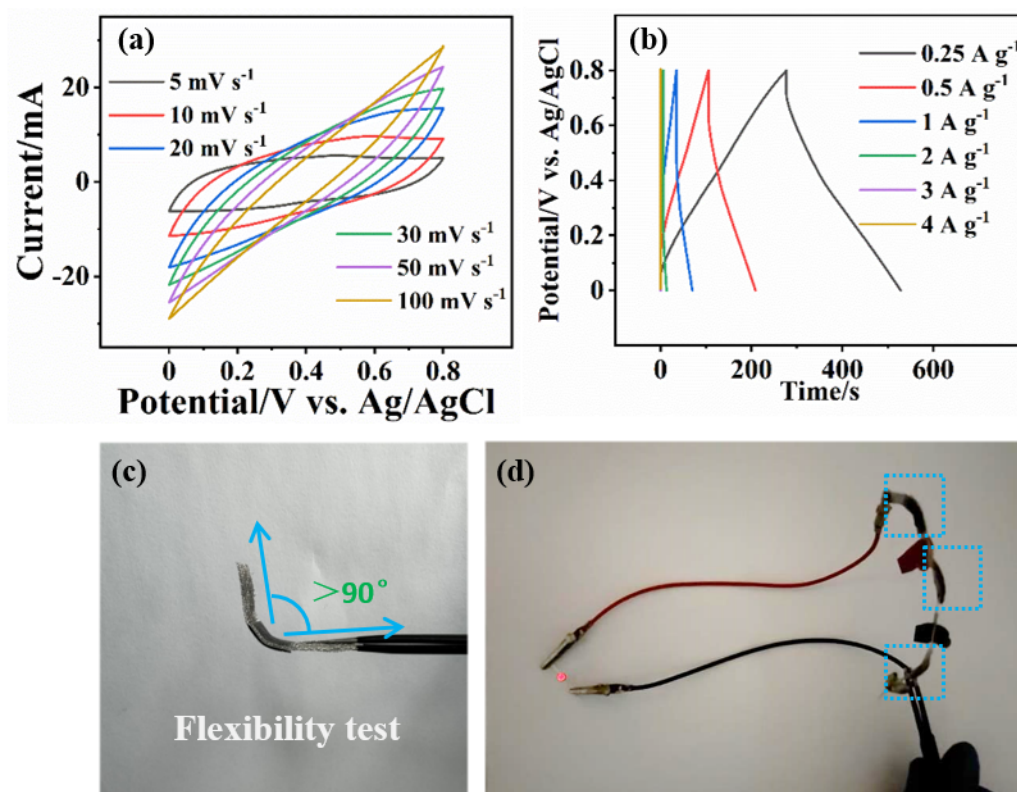

**Fig. S7** (a) CV curves, (b) GCD data, and (c) image of the symmetric SSC after mechanical bending, (g) along with its application in red LED lighting.

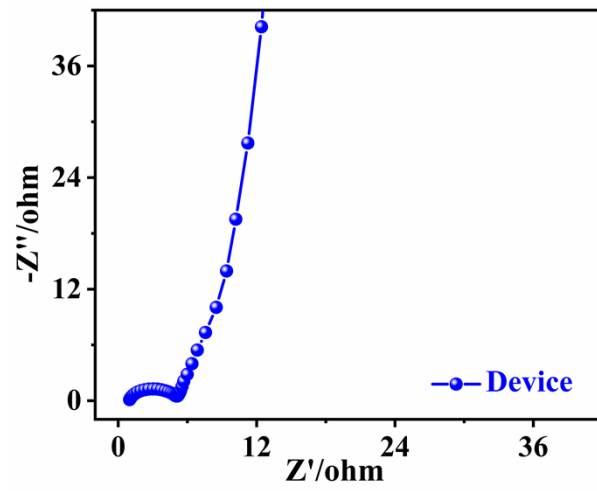

Fig. S8 The Nyquist curves of the symmetric SSC.

**Table S1** Capacitance values of the CNFs/PANI/CQDs electrode and cycling ability of symmetric SSC contrast of relevant reports.

| Electrodes            | Electrolyte                            | Specific capacitance                                        | Cycle life (symmetric SSC)                                    | Ref.             |
|-----------------------|----------------------------------------|-------------------------------------------------------------|---------------------------------------------------------------|------------------|
| PANI-CQDs-2           | 1 M H <sub>2</sub> SO <sub>4</sub>     | 871 F g <sup>-1</sup><br>(at 0.4 A g <sup>-1</sup> )        | 85.0 %<br>(5000 <sup>th</sup> at 3 mA cm <sup>2</sup> )       | [9]              |
| CQD@PANI              | 1 M H <sub>2</sub> SO <sub>4</sub>     | 222.7 F g <sup>-1</sup><br>(at 1 A g <sup>-1</sup> )        | 87.7 %<br>(500 <sup>th</sup> at 1 A g <sup>-1</sup> )         | [16]             |
| FMWCNTs@CQDs@PANI     | 1 M H <sub>2</sub> SO <sub>4</sub>     | 534 F g <sup>-1</sup><br>(at 0.5 A g <sup>-1</sup> )        | —                                                             | [18]             |
| N-CDs@PANI            | 1 M H <sub>2</sub> SO <sub>4</sub>     | 785 F g <sup>-1</sup><br>(at 0.5 A g <sup>-1</sup> )        | —                                                             | [19]             |
| C-dots/PANI           | 1 M H <sub>2</sub> SO <sub>4</sub>     | 264.6 F g <sup>-1</sup><br>(at 2.5 A g <sup>-1</sup> )      | —                                                             | [20]             |
| PANI@CNFs             | 1 M H <sub>2</sub> SO <sub>4</sub>     | 285 C g <sup>-1</sup><br>(at 0.5 A g <sup>-1</sup> )        | 81.0 %<br>(1000 <sup>th</sup> at 10 A g <sup>-1</sup> )       | [29]             |
| PANI/CNF/GNP          | 1 M H <sub>2</sub> SO <sub>4</sub>     | 421.5 F g <sup>-1</sup><br>(at 1 A g <sup>-1</sup> )        | 78.3 %<br>(1000 <sup>th</sup> at 8 A g <sup>-1</sup> )        | [31]             |
| CNFs/PANI             | 1 M H <sub>2</sub> SO <sub>4</sub>     | 325 F g <sup>-1</sup><br>(at 0.5 A g <sup>-1</sup> )        | 80.0 %<br>(6000 <sup>th</sup> at 1 A g <sup>-1</sup> )        | [35]             |
| CD@PANI-0.5           | 0.5 M Na <sub>2</sub> SO <sub>4</sub>  | 609 F g <sup>-1</sup><br>(at 0.5 A g <sup>-1</sup> )        | —                                                             | [38]             |
| CQDs-PANI/CFs         | 1 M H <sub>2</sub> SO <sub>4</sub>     | 738.3 F g <sup>-1</sup><br>(at 1 A g <sup>-1</sup> )        | —                                                             | [41]             |
| PANI-C                | 1 M H <sub>2</sub> SO <sub>4</sub>     | 455.7 F g <sup>-1</sup><br>(at 0.5 A g <sup>-1</sup> )      | 86.0 %<br>(2500 <sup>th</sup> at 5 A g <sup>-1</sup> )        | [45]             |
| <b>CNFs/PANI/CQDs</b> | <b>1 M H<sub>2</sub>SO<sub>4</sub></b> | <b>756.5 F g<sup>-1</sup><br/>(at 0.5 A g<sup>-1</sup>)</b> | <b>81.25 %<br/>(10000<sup>th</sup> at 1 A g<sup>-1</sup>)</b> | <b>this work</b> |
